# Supplementary material
Source: publisher site journal article supplement (https://www.dovepress.com/article/378039)
Supplement: Supplementary file 1 [file get_supplementary_file.php]

**SUPPLEMENTARY MATERIAL**

1. **Supplementary Methods**

*1.1 Analysis of Case-Control Data*

Vaccine effectiveness (VE) is calculated as the proportionate reduction in risk of infection in immunized versus unimmunized individuals. Case-control studies can be used to calculate the exposure odds ratio (OR), which can approximate the relative risk, provided that the outcome is rare. Under this rare-disease assumption, the VE can then be calculated as (1 − OR) x 100%.

Since no randomization can be done, to control for confounding after the data is collected, investigators must either partition the data into a series of strata or use multivariable statistical modeling. Partitioning or stratifying entails dividing the dataset into a series of subgroups or strata to create homogeneity for each confounding variable. If there are multiple confounders that need to be considered, this approach becomes statistically inefficient as each additional stratum decreases the sample size, and subsequently, the statistical power. An alternative approach is to use statistical modeling. In a matched case-control study, the OR is typically derived through conditional logistic regression with strata assigned for each case-control group. In the VE framework, the modeling strategy is to create models that always contain the exposure variable of interest (e.g., receipt of a vaccine) and additional covariates are introduced as needed to address any confounding of the treatment effect.

*Bayesian Model Averaging Framework*

Bayes theorem of total probability describes the probability of observing a particular event based on prior information regarding a related event. This Bayesian reasoning can be extended to the problem of model selection, and the probability that any particular model is the closest approximation to the “true model” (posterior model probability) can be estimated given some prior knowledge about the model. The posterior probability of any given model can then be described as

|  | (1) |
| --- | --- |

where denotes the probability of model given data D, denotes the prior probability, and is the integrated likelihood of the model .

To approximate prior probabilities of each model, we use the Bayesian information criterion (BIC), which can easily be computed from the regression output using the sample size and the maximum likelihood of the model, namely

|  | (2) |
| --- | --- |

where n is the study sample size, and j is the total number of variables in the given model.

To estimate the conditional posterior probabilities of each model, we estimated BIC for each of the models in the set (i.e., , *k* = 1, 2, …, *Z*), and then divided the BIC of each candidate model over the sum of all the BICs so that they all add up to one. Specifically,

|  | (3) |
| --- | --- |

Where denotes the weight for Model k, is the difference of BIC for Model k and the smallest BIC among all of the candidate models, and the prior probabilities are all 1/Z.

How the modeling space should be defined for BMA analyses is subject to much debate. Some early BMA adopters have advocated that model averaging should be performed only on a small number of carefully selected and fully justified model specifications (rather than across all possible models). This is based on the idea that just as uninformative variables decrease the explanatory power of a model, so does the inclusion of uninformative models decrease the explanatory power and may even bias the results of the BMA analyses. However, some argue that restricting BMA to only the models that the investigator considers as "most justified" could introduce researcher bias. Setting a model's prior probability to zero a priori may weaken one of the greatest strengths of BMA: the ability to be transparent and systematic in consideration of alternative models. Moreover, systematic and exhaustive searches are more likely than non-exhaustive searches to find the best-fitting models for averaging procedures.

Given the computational demand and time required to consider the entire modeling space (every possible variable combination), most previous case-control studies that have incorporated BMA applied some sort of a sampling algorithm (e.g., Leaps and Bounds, Gibbs, or Markov Chain Monte Carlo) to narrow the modeling space to a small subset of alternative models. However, with the emergence of parallel computing, which allows numerous estimations to be conducted concurrently, several statistical algorithms can now solve thousands of regressions in minutes, allowing bigger modeling spaces to be considered. Our approach, therefore, aims to strike a balance between the two views by both conducting an exhaustive systematic search for candidate models yet methodically selecting the best-fitting models for model-averaging procedures. To this end, we first search for potential models using every combination without repetition of non-collinear control variables. Then, we used the estimated posterior model probabilities to reduce the modeling space to the most realistic models by dropping the models that provide little to no improvement in fit (i.e., those with a posterior probability of <1% relative to the best model). Finally, we recompute the BIC-weights for the newly defined subset of models for model averaging procedures. The weighted average of the vaccine coefficient and its standard error (SE) is calculated as follows:

|  | (4) |
| --- | --- |
|  | (5) |

Where S represents the set of highest probability models selected, and the posterior mean of the vaccine variable in Model k. To estimate the posterior inclusion probability (PIP) of each potential confounder, we took the sum of the BIC-weights from all the models that included the confounder of interest. With this approach, if a potential confounder is included in all of the top models, then the PIP will approximate 1 and is equivalent to the probability that it would be included in the top-ranked model.
